# Supplementary material
Source: PubMed Central journal article supplement (PMC5702741)

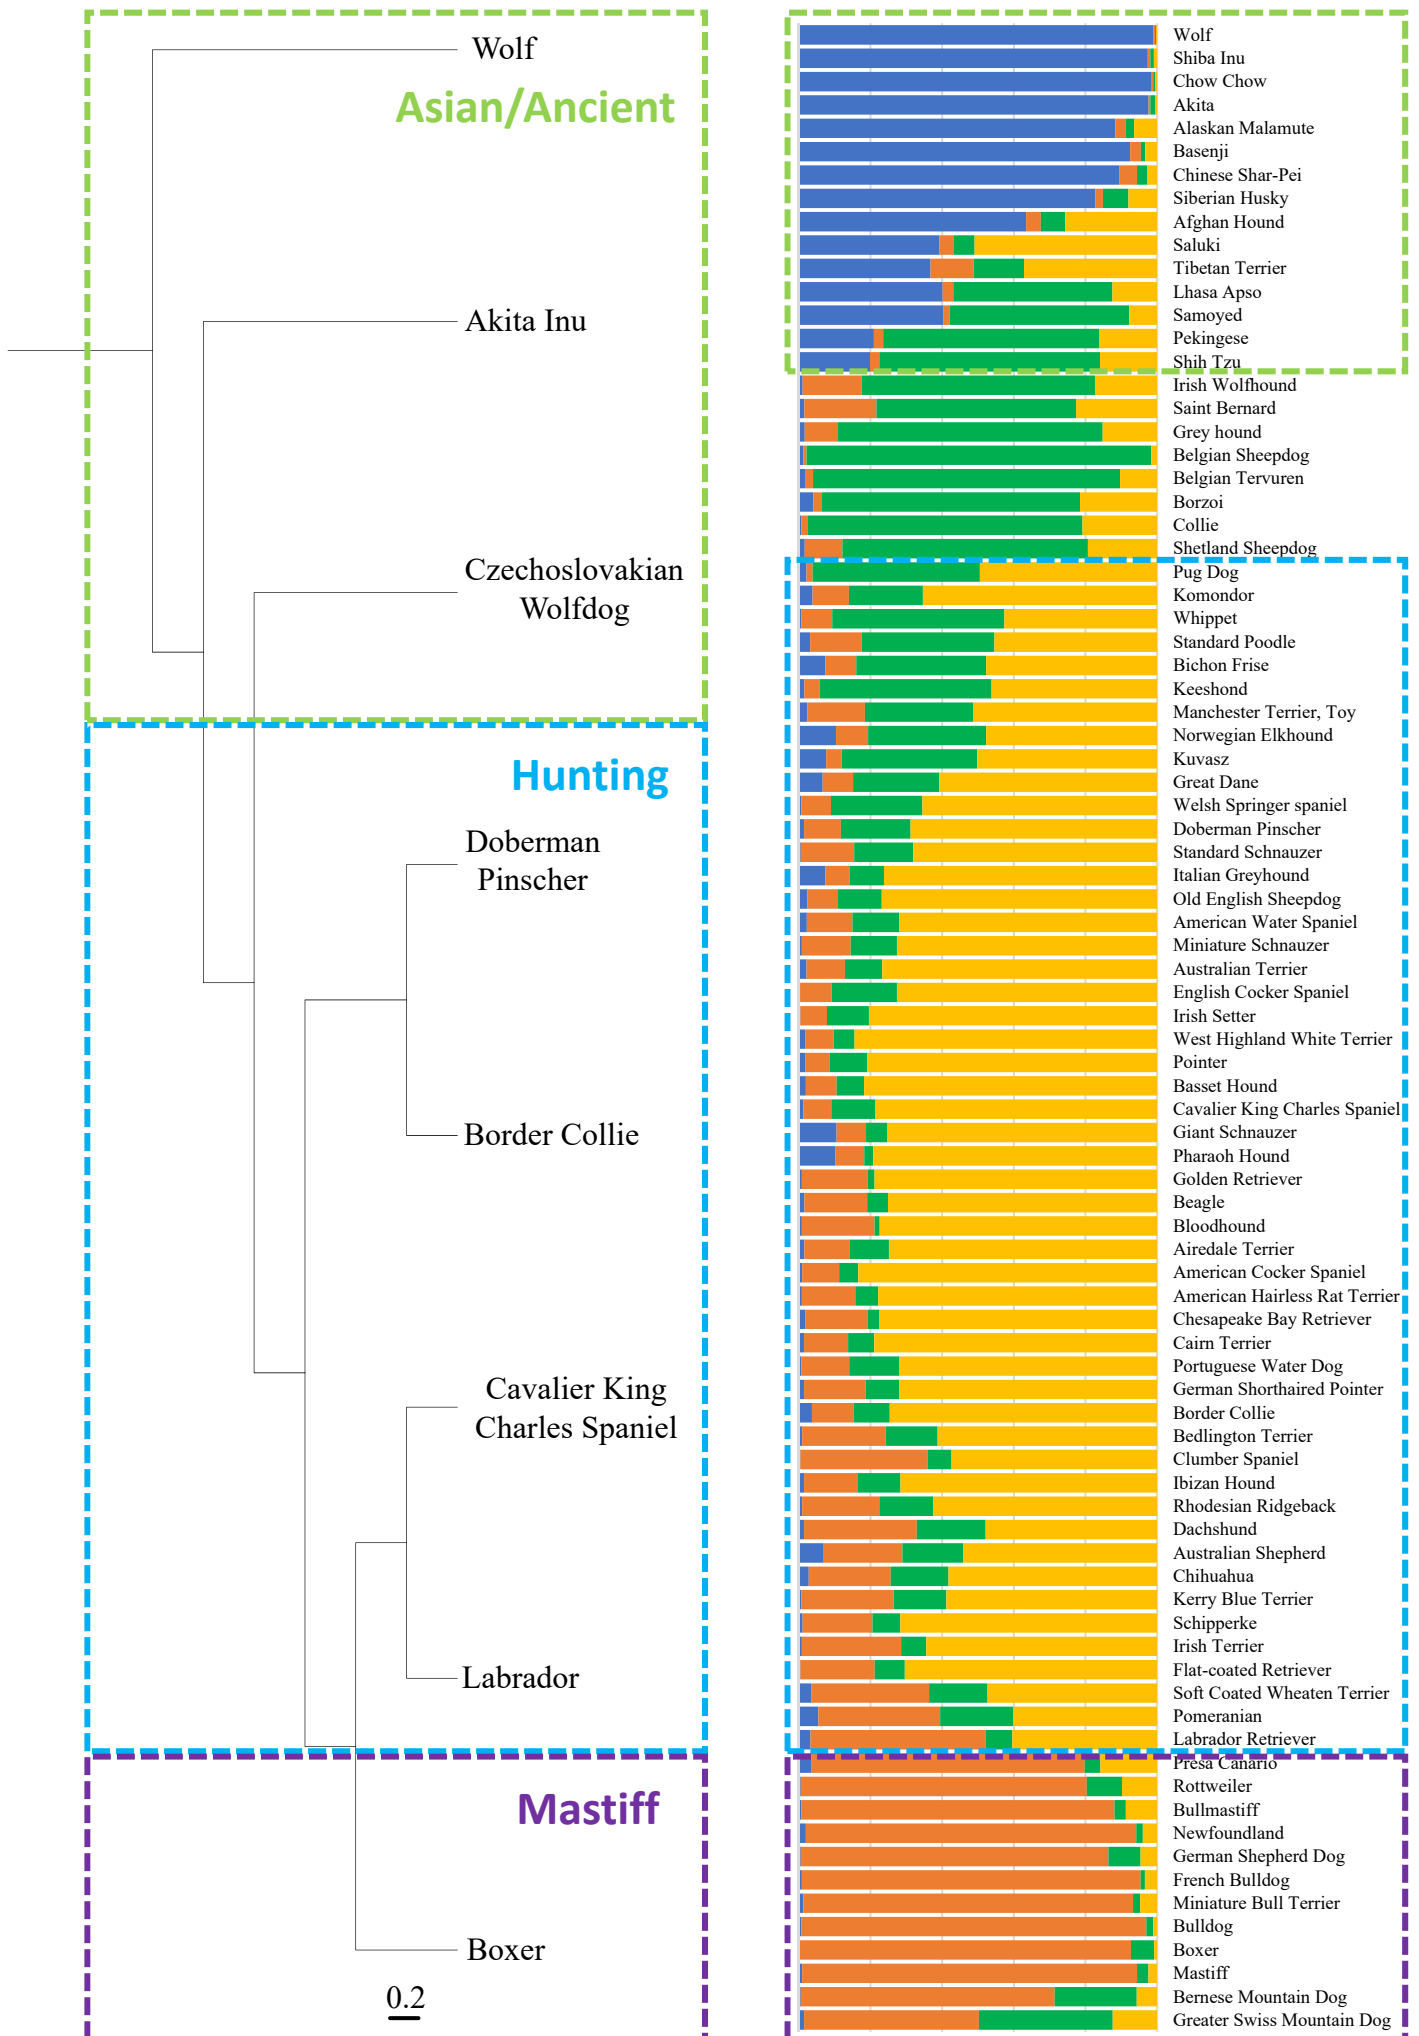

**Figure S2**

Supplement: ismej2017138x3.pdf [file ismej2017138x3.pdf]

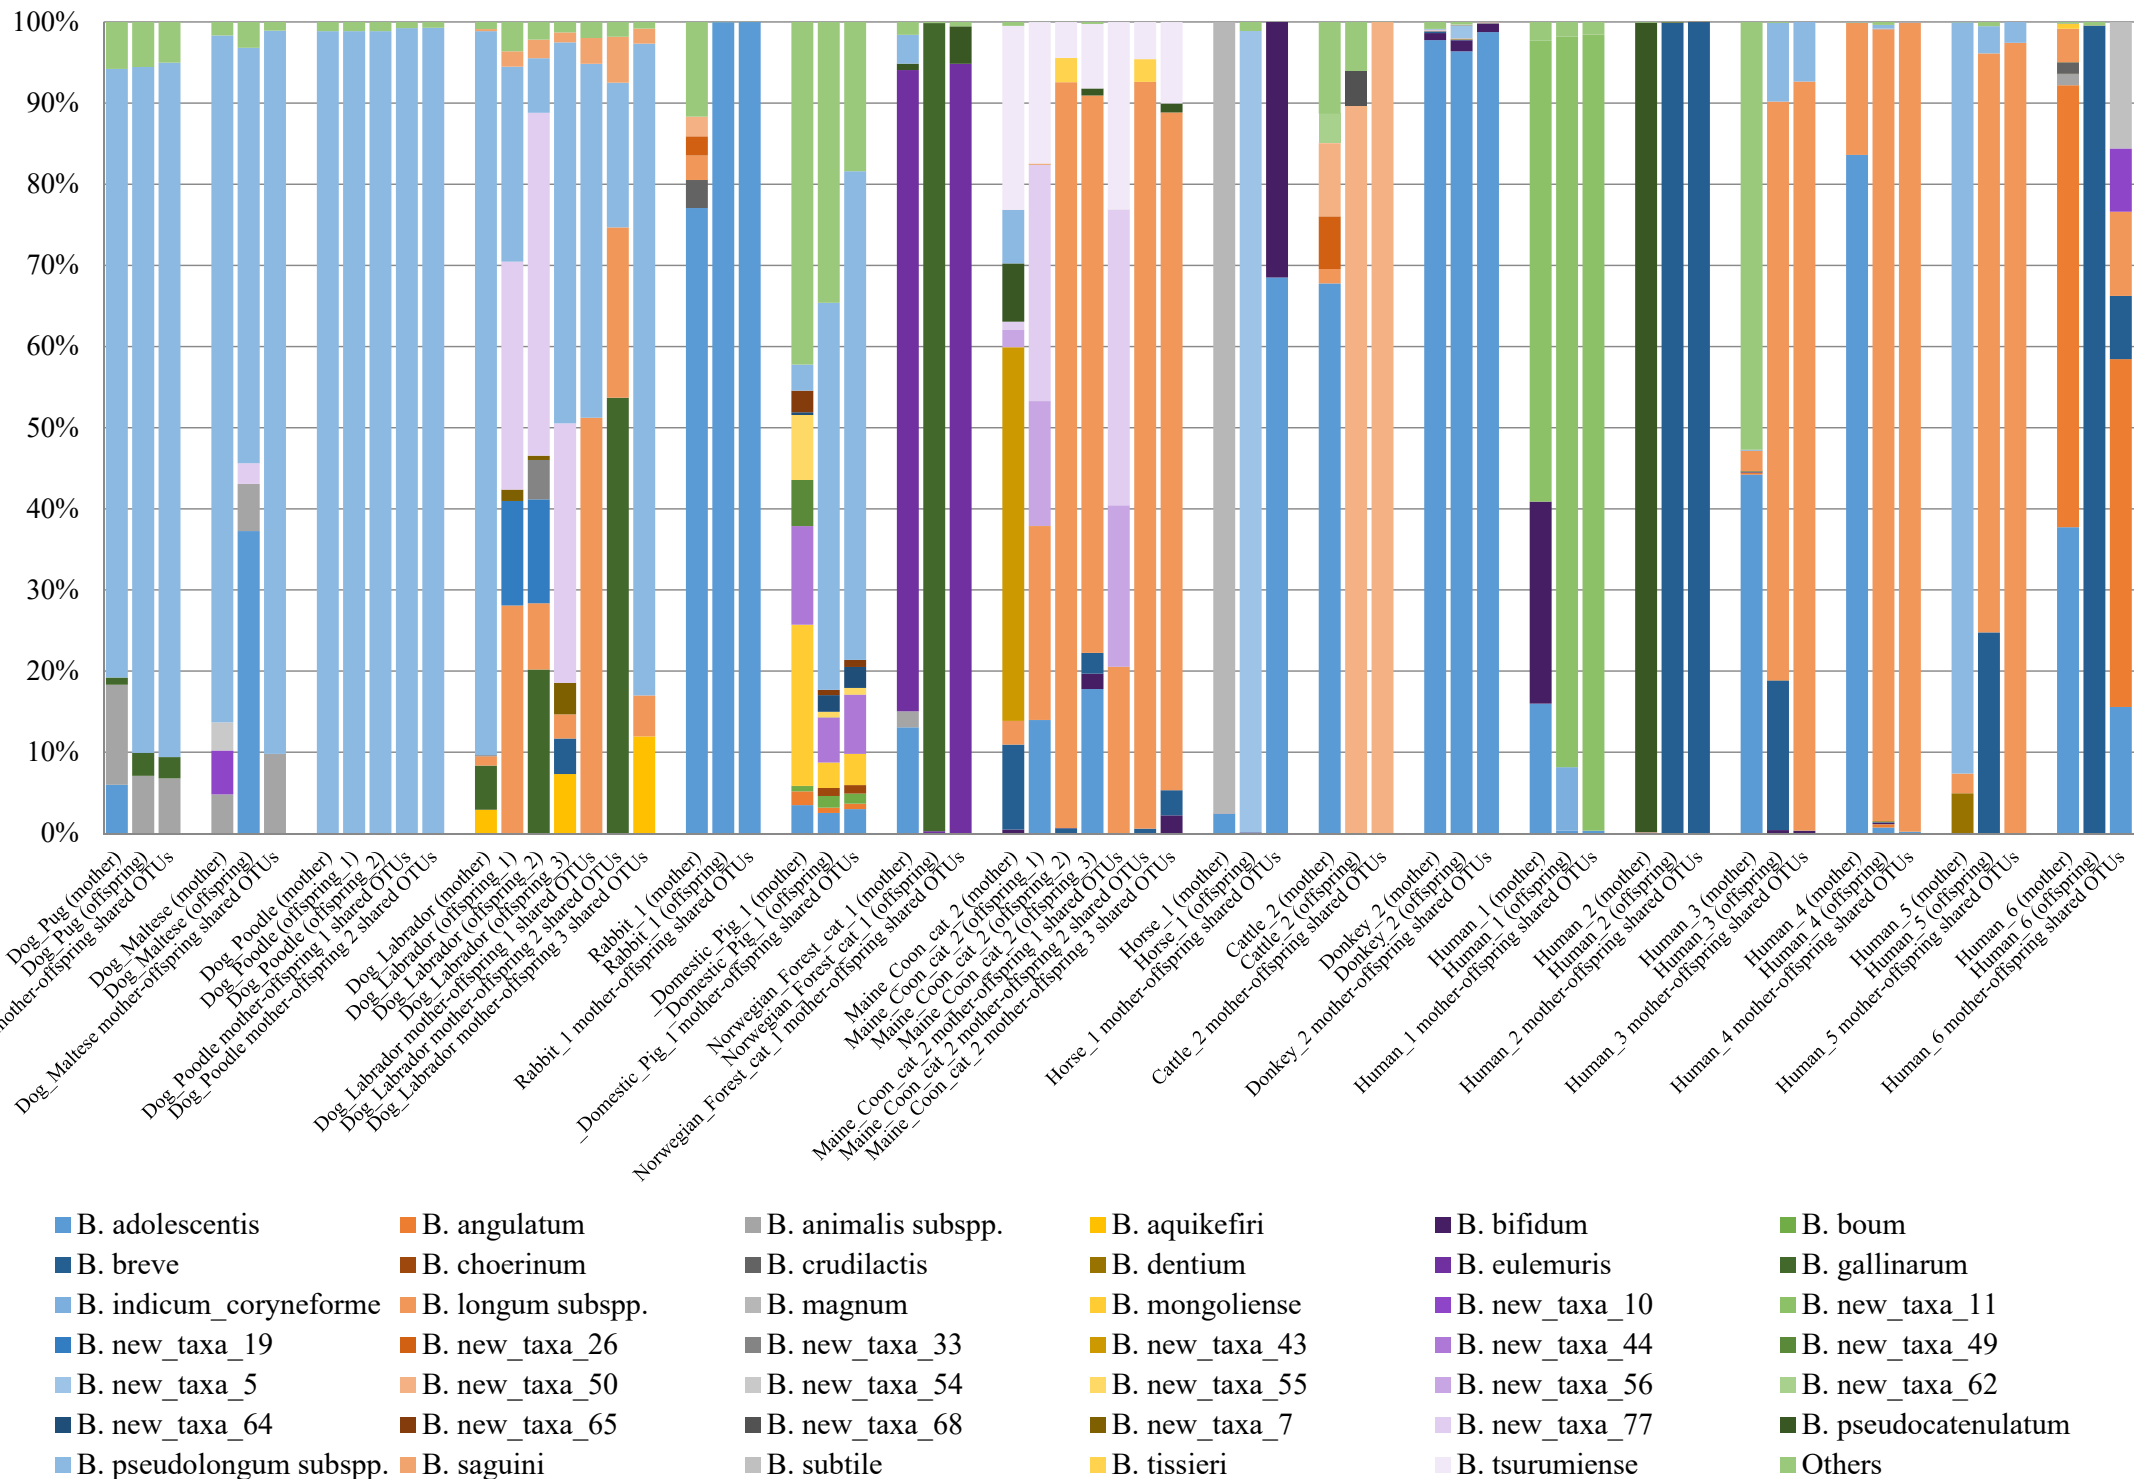

Figure S4

Supplement: ismej2017138x5.pdf [file ismej2017138x5.pdf]

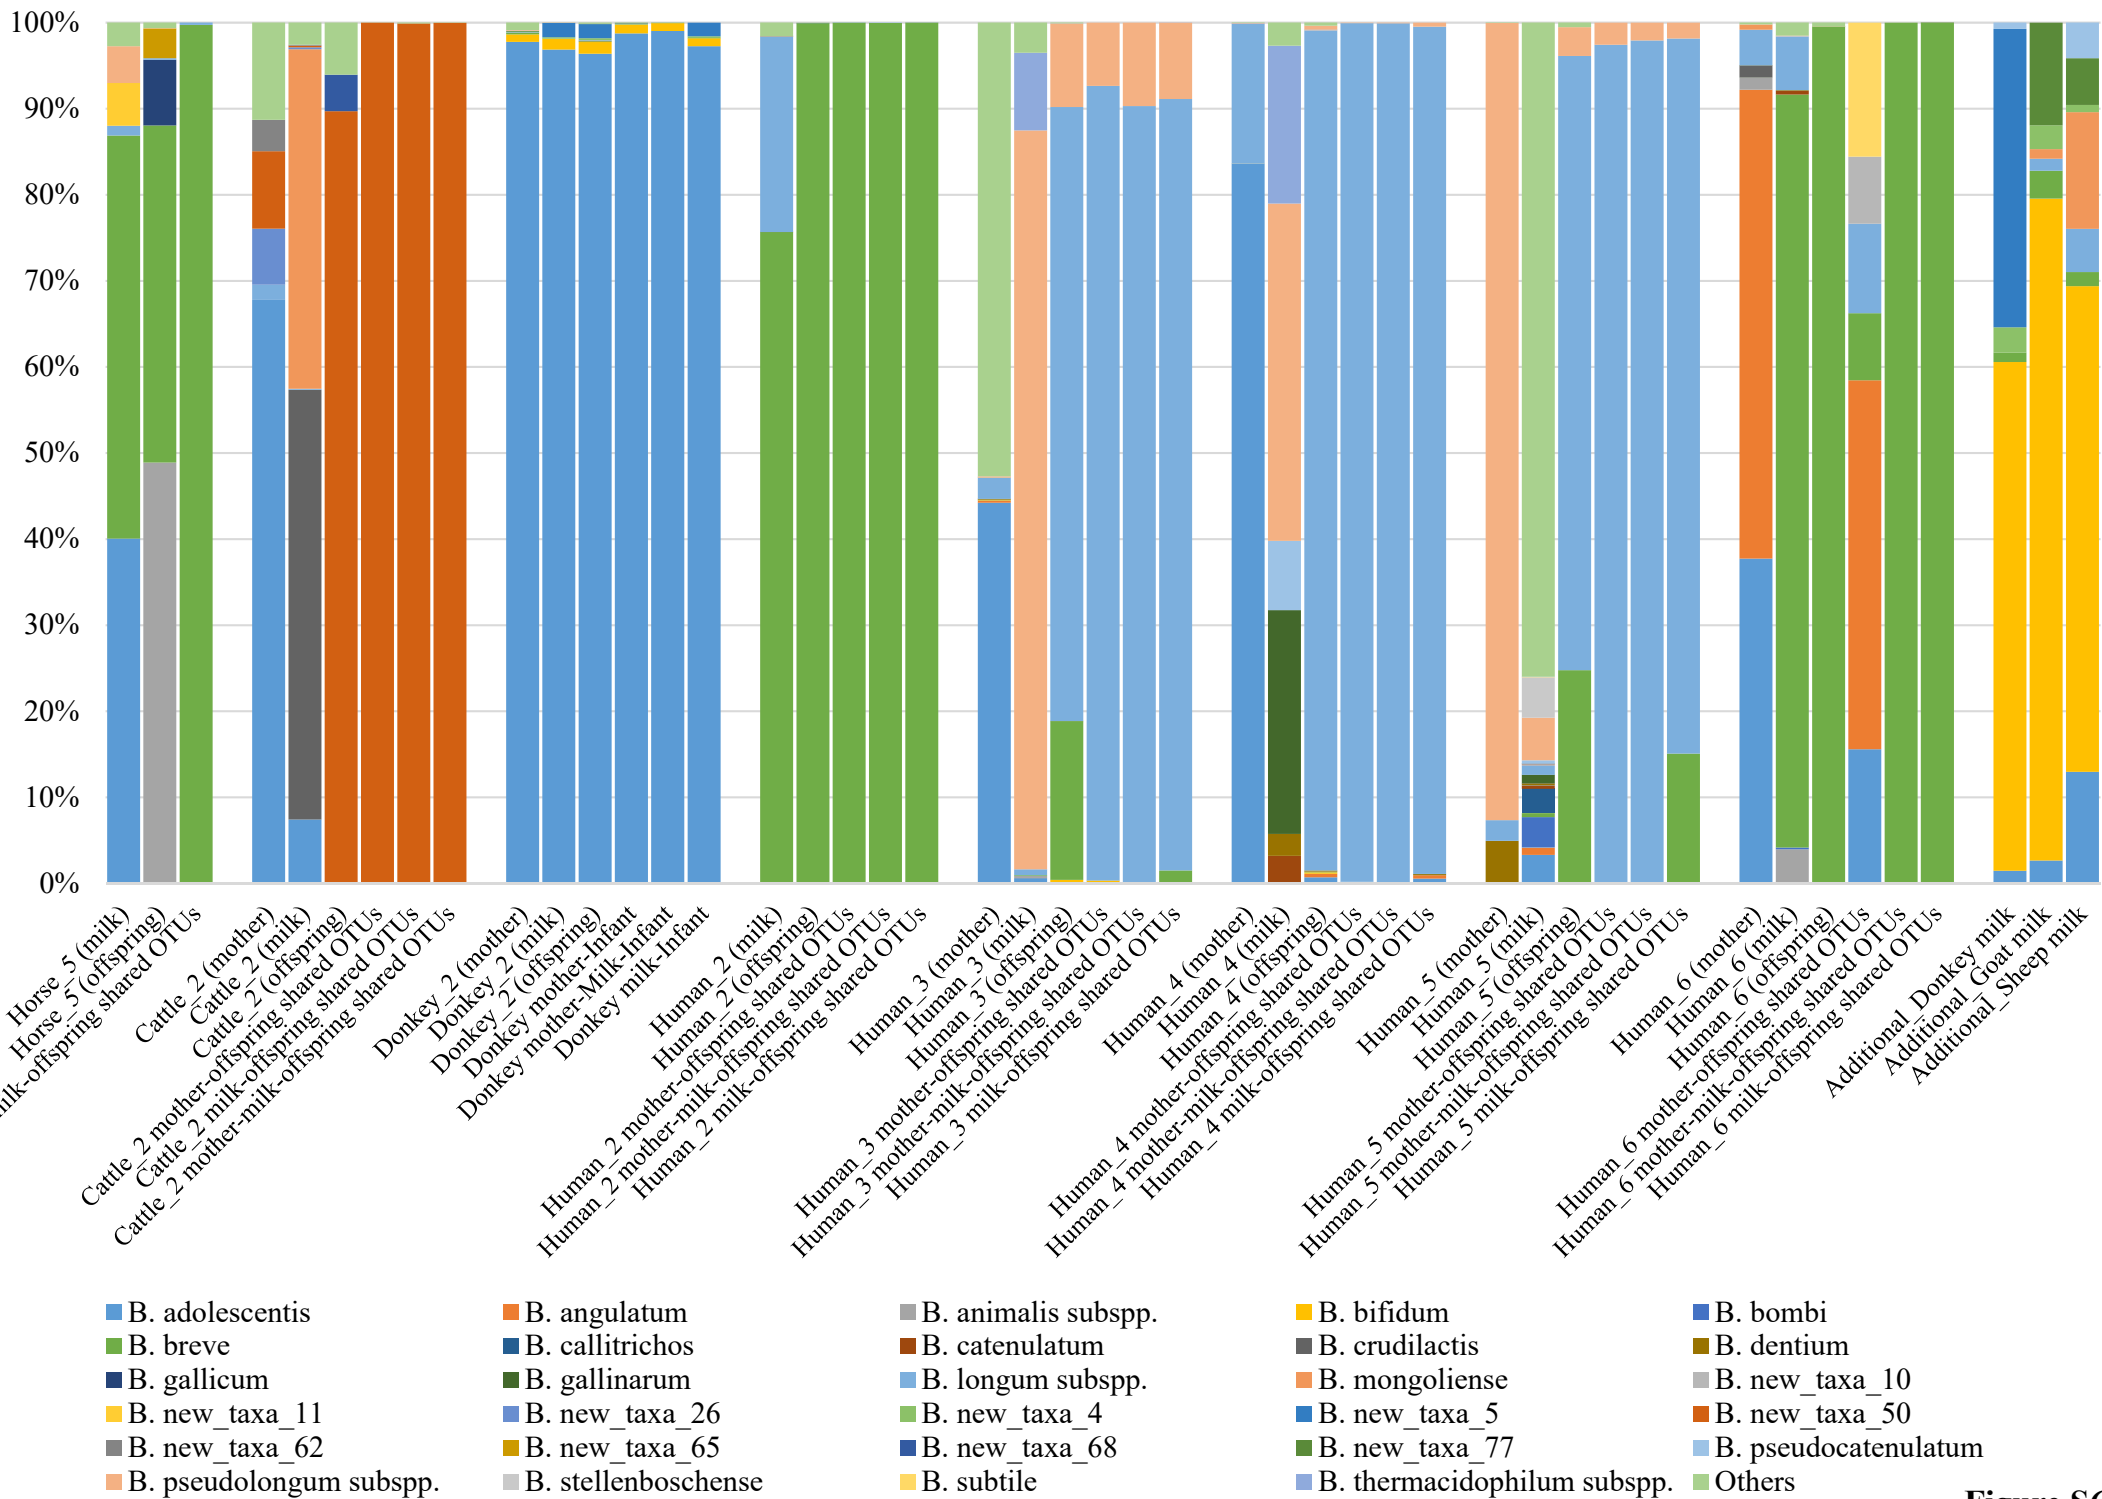

Figure S6

Supplement: ismej2017138x7.pdf [file ismej2017138x7.pdf]

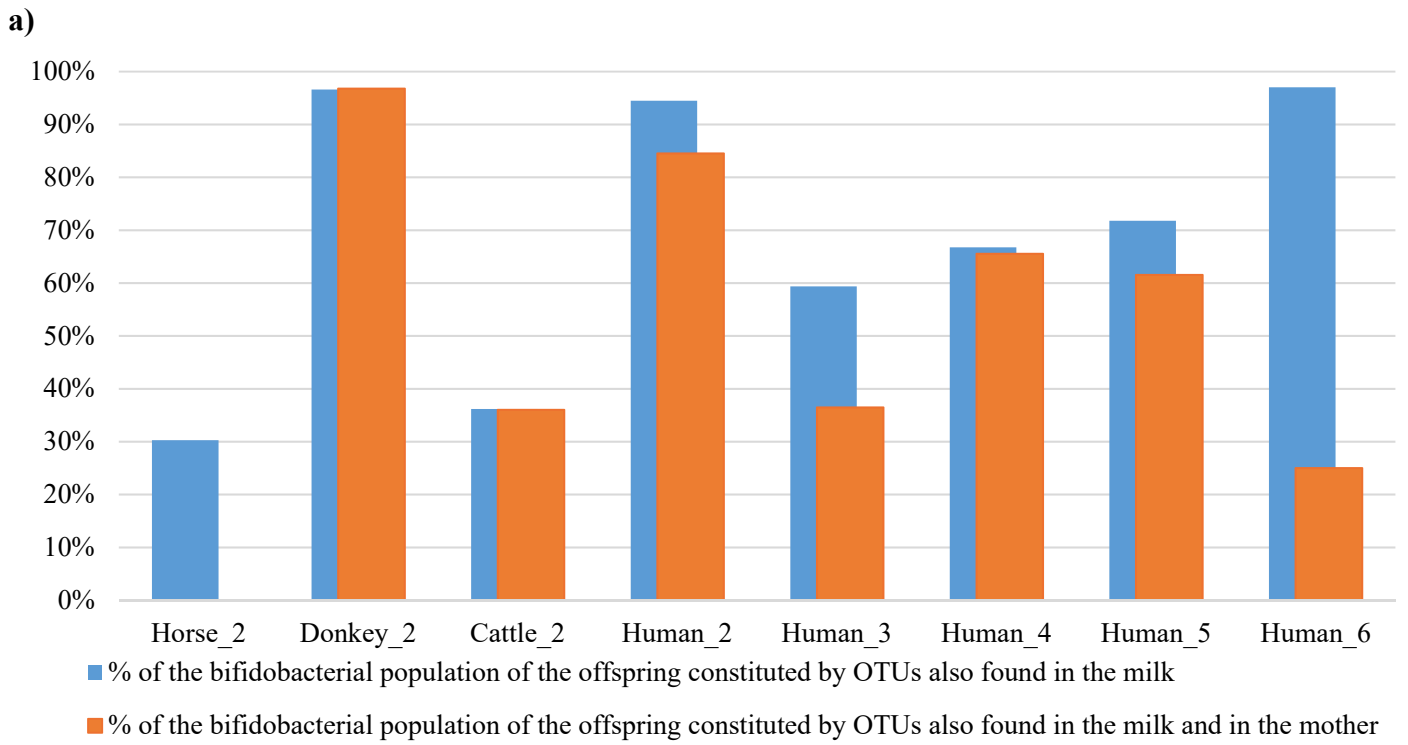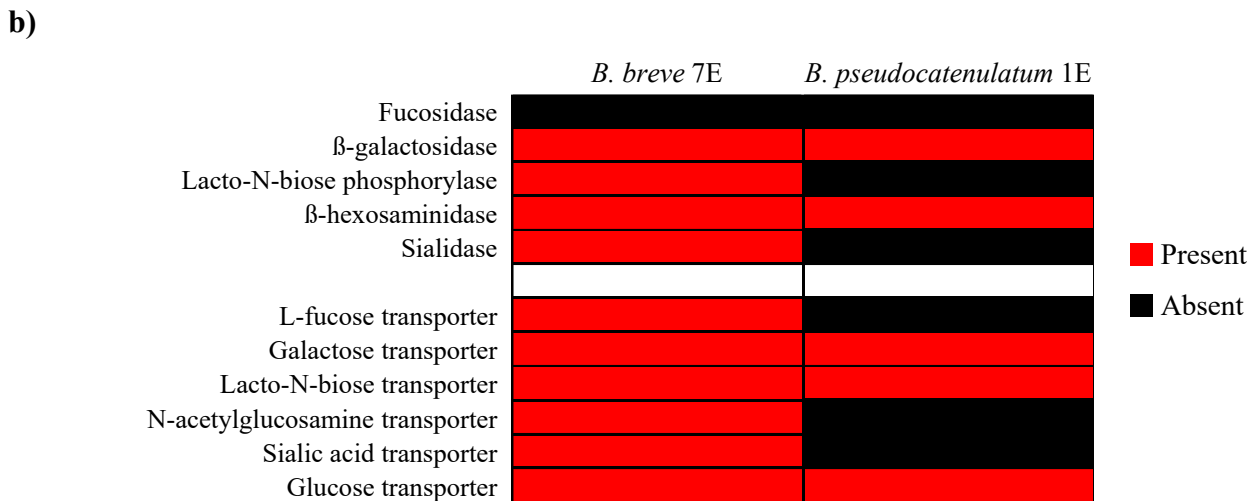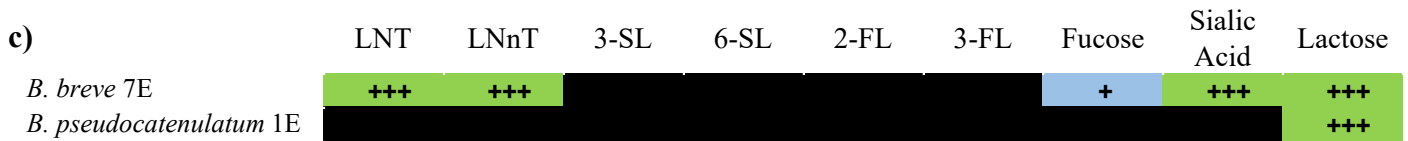

**Figure S7**

Supplement: ismej2017138x8.pdf [file ismej2017138x8.pdf]
